# Supplementary material for: Evaluating WRF-GC v2.0 predictions of boundary layer height and vertical ozone profile during the 2021 TRACER-AQ campaign in Houston, Texas
Source: Copernicus journal article supplement (doi:10.5194/gmd-16-5493-2023), 2023-09-29
Supplement: Supplementary file 1 [file gmd-16-5493-2023-supplement.pdf]

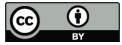

*Supplement of*

## **Evaluating WRF-GC v2.0 predictions of boundary layer height and vertical ozone profile during the 2021 TRACER-AQ campaign in Houston, Texas**

**Xueying Liu et al.**

*Correspondence to:* Yuxuan Wang ([ywang246@central.uh.edu](mailto:ywang246@central.uh.edu))

The copyright of individual parts of the supplement might differ from the article licence.

1 **Text S1. Identification of ozone episodes**

2 Ozone exceedance days were identified according to surface measurements from the TCEQ  
3 CAMS (onshore) and the boats operating in Galveston Bay during the field campaign (offshore).  
4 Full description of the boat observations is given in Li et al. (2023). The criteria used in this  
5 study are (1) any onshore site from the CAMS network in Houston and Galveston or (2) offshore  
6 boat ozone observations that registered daily maximum 8-hour average (MDA8) ozone in  
7 exceedance of 70 ppbv, the current air quality standard for ozone. In total, six ozone episodes  
8 were identified during the whole campaign period over July-Oct 2021 (Table S1). Among these,  
9 three ozone episodes are in the extensive operating period of September 2021.

10

11 **Table S1.** Dates of ozone episodes and the associated MDA8 O<sub>3</sub> maximum.

| Episodes      | Highest MDA8 O <sub>3</sub> (ppbv) |                    |
|---------------|------------------------------------|--------------------|
|               | Onshore<br>(CAMS)                  | Offshore<br>(Boat) |
| 07/26 - 07/28 | 97                                 | 72                 |
| 08/25         | 78                                 | 50                 |
| 09/06 - 09/11 | 89                                 | 79                 |
| 09/17 - 09/19 | 75                                 | 80                 |
| 09/23 - 09/26 | 81                                 | 65                 |
| 10/06 - 10/09 | 92                                 | 96                 |

12

13

1 **Text S2. Description of WRF nudging**

2 We used observation nudging together with surface analysis nudging (also known as surface grid  
3 nudging) in WRF as the data assimilation method. In observation nudging, the modeled fields are  
4 nudged to match better with observations at individual locations with a radius of influence. The  
5 data used for observation nudging are ground-based hourly measurements of temperature,  
6 relative humidity as well as wind speed and direction from the Texas Commission on  
7 Environmental Quality (TCEQ) continuous ambient monitoring stations (CAMS). Based on site  
8 elevations, most nudging is performed within 500 m above sea level in eastern Texas, as shown  
9 in Figure S1. There are around 155, 98, and 49 observations ingested into WRF domains 1, 2 and  
10 3, respectively. In analysis nudging, temperature, moisture and wind fields are nudged toward  
11 gridded analysis above the PBL (~1 km). The OBSGRID program was used for both observation  
12 nudging and surface analysis nudging. The program generated merged input files so that  
13 observation nudging and surface analysis nudging were conducted simultaneously when running  
14 the model. In addition to data assimilation, we adopted objective analysis in OBSGRID to  
15 provide better initial and boundary conditions, where first-guess meteorological fields are  
16 updated by incorporating observational data. The combined adoption of observation nudging,  
17 surface analysis nudging, and objective analysis in the [Nudged] simulation was to maximize the  
18 benefits of assimilating observations, as recommended by Chapter 7 of the WRF user guide.

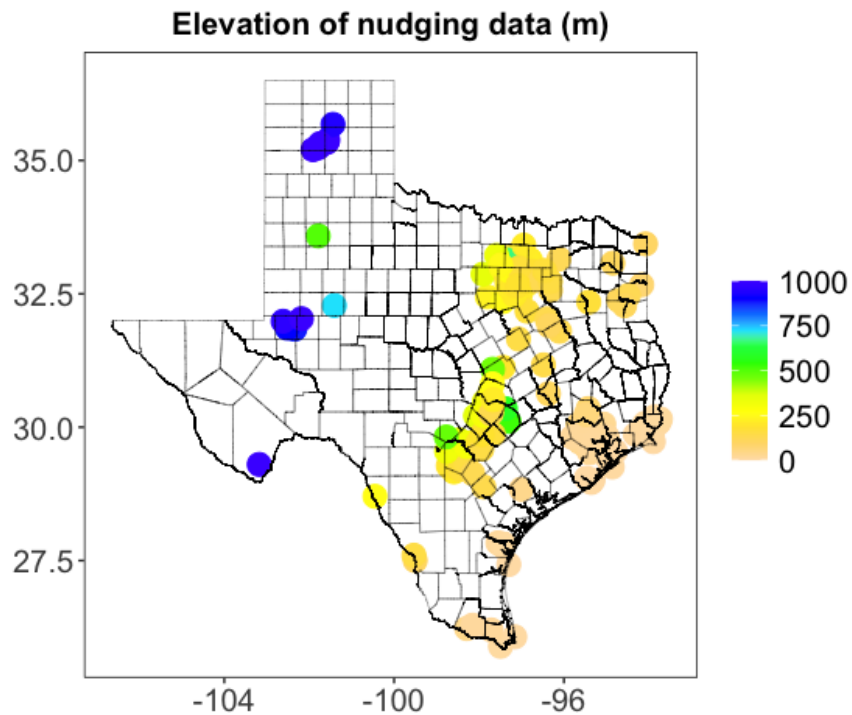

19 **Figure S1.** Elevation of the Texas Commission on Environmental Quality (TCEQ) continuous  
20 ambient monitoring stations (CAMS) used as observational data for WRF nudging methods.  
21  
22  
23

1 **Text S3. Evaluation of all model experiments**

2 All WRF simulations are shown in Table S2. We evaluated the spatial and temporal variabilities  
 3 of all simulations against the onshore TCEQ CAMS (Figure S2; Figure S3; Table S3) and the  
 4 offshore boat measurements (Figure S4; Figure S5; Table S4). The WRF model generally  
 5 reproduces observed temporal variability and spatial distribution in key meteorological  
 6 parameters with a correlation coefficient higher than 0.5 in most cases. However, the model,  
 7 regardless of configuration settings, shows persistent low biases in PBL heights, low biases in air  
 8 temperatures, high biases in relative humidity, and high biases in wind speed. While different  
 9 WRF configuration has its own advantage in reducing model biases, [HRRR], [Nudged] and  
 10 [Reinit] configurations stand out as the three best simulations based on campaign-wide statistics.  
 11 Considering that [Nudged] requires additional efforts to prepare observational datasets and  
 12 [Reinit] needs to automate the model running process, [HRRR] is the easiest and the most  
 13 effective option to reproduce meteorology for computationally expensive chemistry simulations  
 14 and was thus selected to be presented in the main text.

15  
 16 **Table S2.** List of model experiments.

| Simulations | BC Meteorology | PBL  | Microphysics | Nudging | Reinitializing |
|-------------|----------------|------|--------------|---------|----------------|
| [Base]      | NCEP FNL       | MYNN | 2M           | No      | No             |
| [WSM6]      | NCEP FNL       | MYNN | WSM6         | No      | No             |
| [YSU]       | NCEP FNL       | YSU  | 2M           | No      | No             |
| [ACM2]      | NCEP FNL       | ACM2 | 2M           | No      | No             |
| [ERA5]      | ECMWF ERA5     | MYNN | 2M           | No      | No             |
| [HRRR]      | HRRR           | MYNN | 2M           | No      | No             |
| [Nudged]    | NCEP FNL       | MYNN | 2M           | Yes     | No             |
| [Reinit]    | NCEP FNL       | MYNN | 2M           | No      | Yes            |

17  
 18 The mean of wind speed and direction is calculated using the vector notation approach, a  
 19 commonly used method in wind evaluations, as described in Yu et al. (2023). This method treats  
 20 wind as vectors with their u (eastward) and v (northward) wind components. First, the mean u  
 21 and v wind components are found by averaging all u and v wind values over a given time period.  
 22 Then, the resultant vector is determined by taking the square root of the sum of the squares of the  
 23 mean u and mean v wind components. The magnitude of resultant vector represents the mean  
 24 wind speed, and the angle of the resultant vector represents the mean wind direction.

25  
 26 The difference between observed and modeled wind direction was calculated as below.

$$\Delta = \begin{cases} M - O, & \text{when } |M - O| \leq 180^\circ \\ (M - O) \left(1 - \frac{360}{|M - O|}\right), & \text{when } |M - O| > 180^\circ \end{cases}$$

27  
 28 where M is the model output, and O is the observation. The correlation between observed and  
 29 modeled wind direction was determined by a circular correlation coefficient as below.

$$R = \frac{\sum_{i=1}^N \sin(M_i - \bar{M}) \sin(O_i - \bar{O})}{\sqrt{\sum_{i=1}^N \sin^2(M_i - \bar{M})} \sqrt{\sum_{i=1}^N \sin^2(O_i - \bar{O})}}$$

30  
 31

1

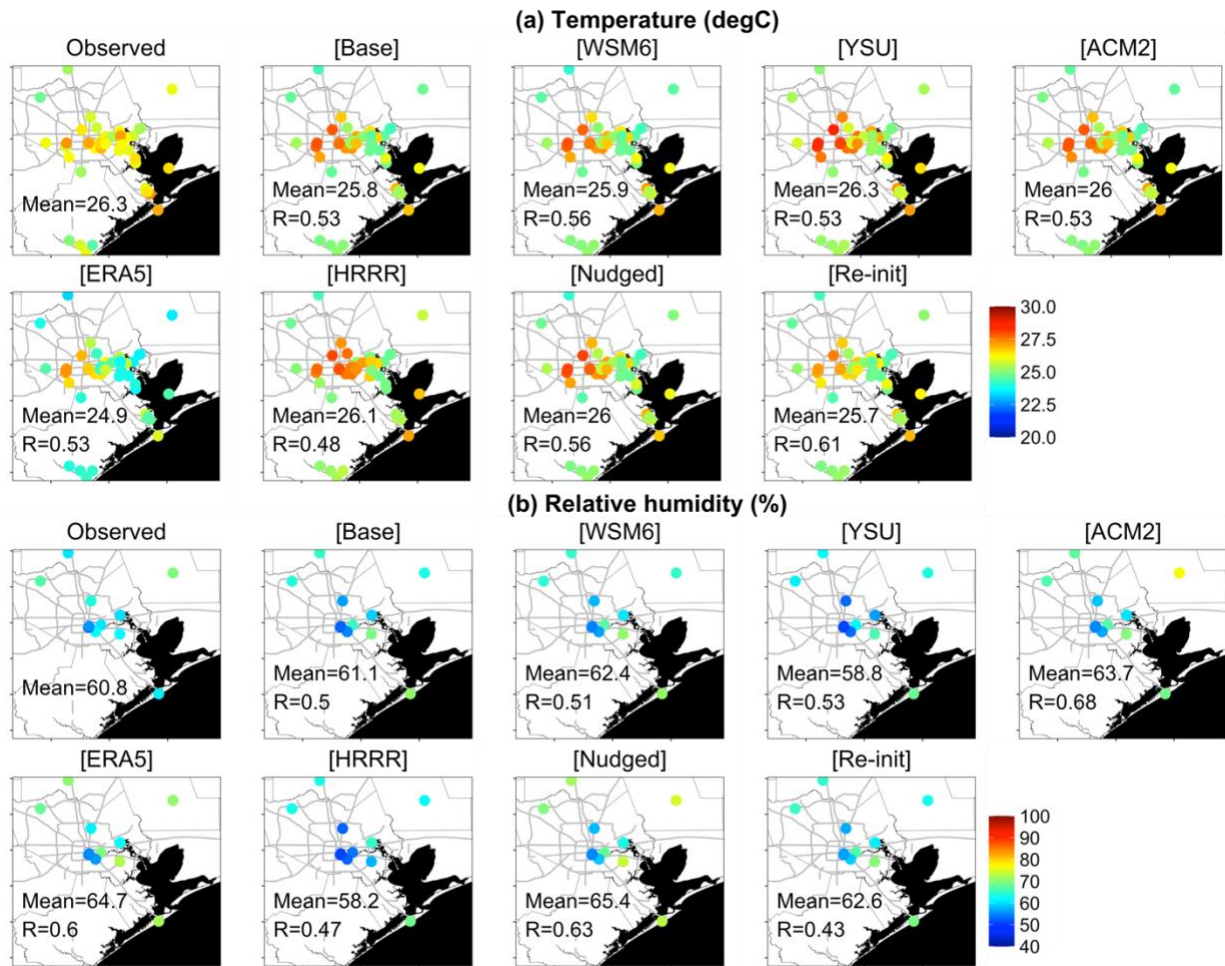

2

3

4

5

6

7

8

9

10

**Figure S2.** Spatial distribution of temporal averages of CAMS-observed and modeled mean meteorology during ozone episodes. The averages of wind speed and directions are calculated using the directional and vector mean approach. First, the mean of the u-wind (and v-wind) component is computed by averaging all u-wind (and v-wind) values at each station over the given period of time. Then, the mean wind speed and direction are calculated based on these mean u and v wind components at each station.

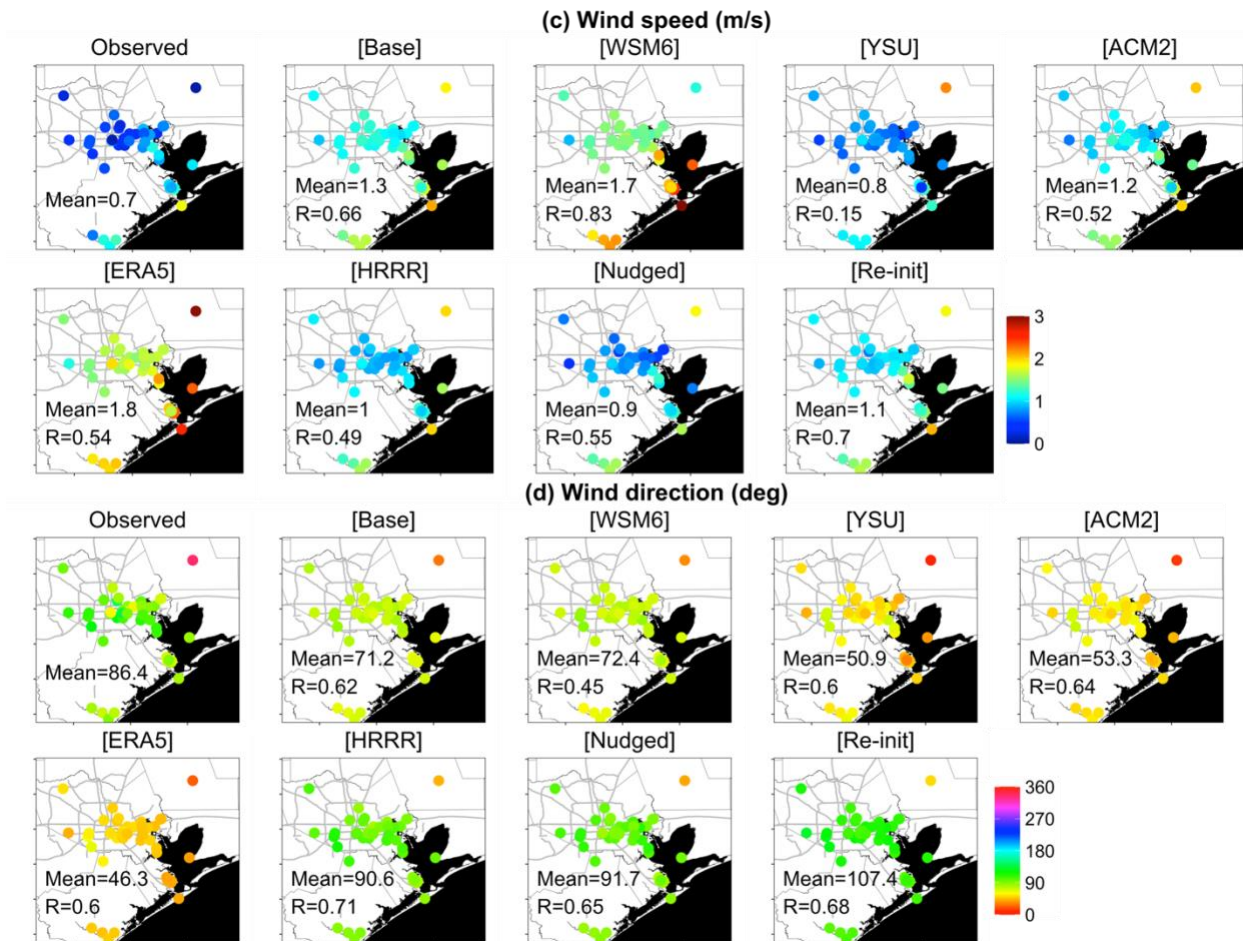

1  
2 **Figure S2 (continued).** Spatial distribution of temporal averages of CAMS-observed and  
3 modeled mean meteorology during ozone episodes. The averages of wind speed and directions  
4 are calculated using the directional and vector mean approach. First, the mean of the u-wind (and  
5 v-wind) component is computed by averaging all u-wind (and v-wind) values at each station over  
6 the given period of time. Then, the mean wind speed and direction are calculated based on these  
7 mean u and v wind components at each station.

8



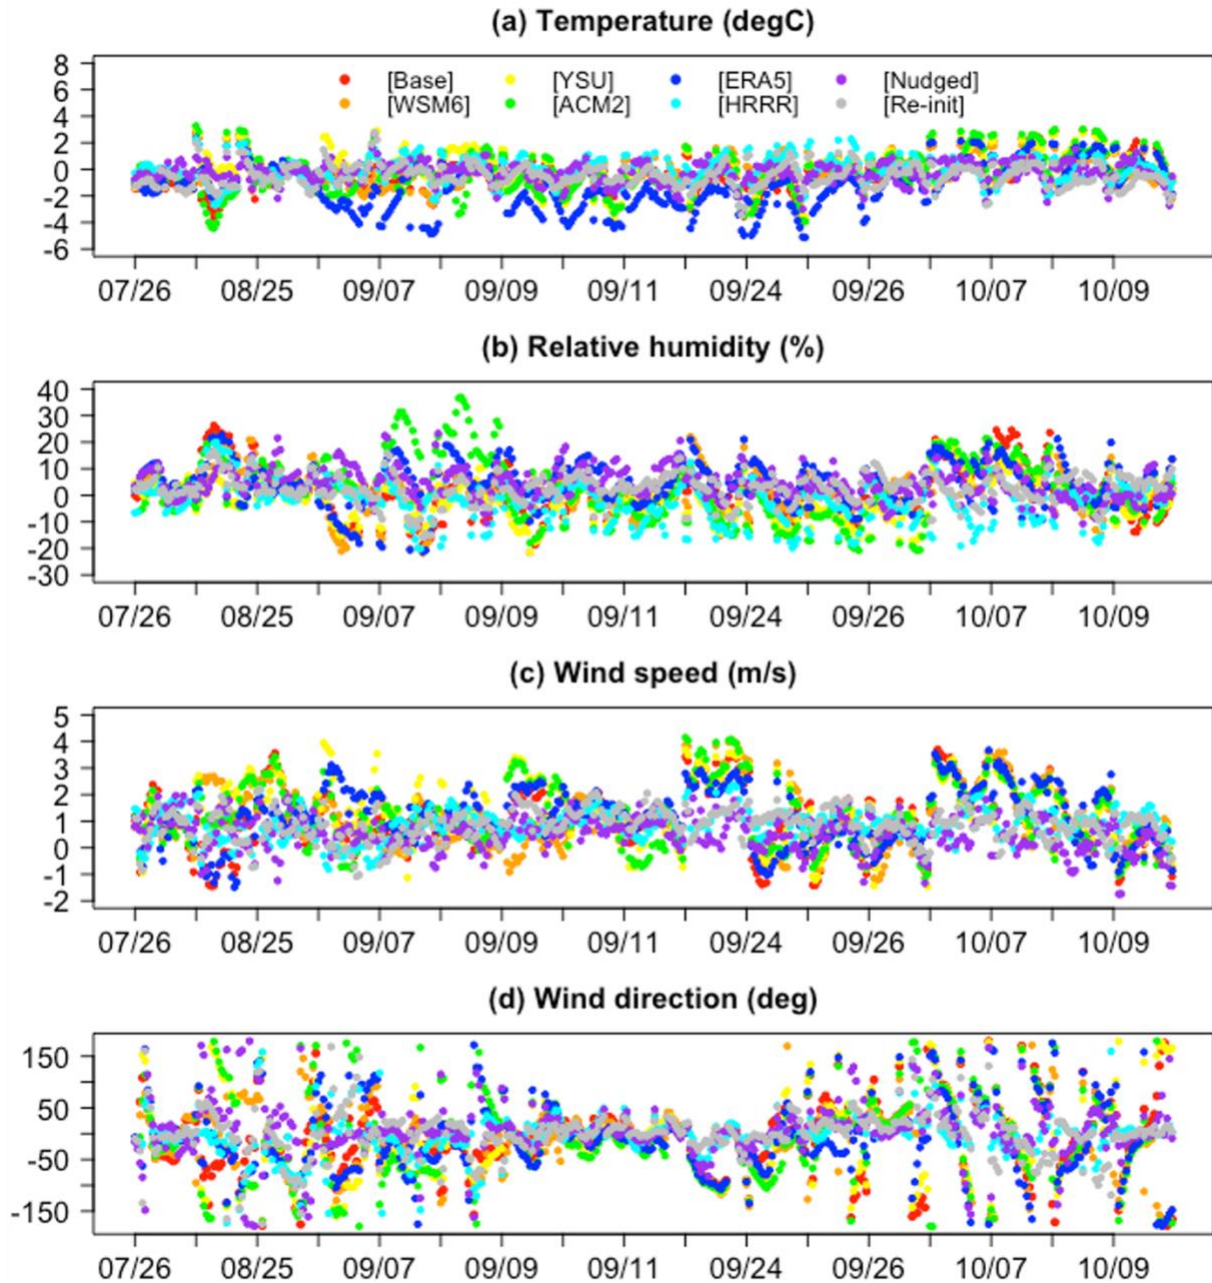

1  
 2 **Figure S3.** Hourly time series of observation-model differences (i.e., model minus observation)  
 3 are shown for (a) air temperature, (b) relative humidity, (c) wind speed and (d) wind direction.  
 4 The differences are spatial averages across all CAMS stations and the WRF model equivalents  
 5 during ozone episodes. Refer to Text S3 for the calculations of spatial averages of wind speed  
 6 and directions, as well as the differences between observed and modeled wind directions.

7

8

1 **Table S3.** Performance metrics of spatiotemporal variability between CAMS-observed and  
2 WRF-modeled meteorology during ozone episodes. Hourly meteorology at all stations is used  
3 for the calculation of performance metrics below. All metrics have the same unit as  
4 meteorological variables, except that the correlation coefficient (R) and normal mean bias  
5 (NMB) are unitless. OBS and MOD represent the spatial and temporal averages of observations  
6 and model equivalents, respectively.

| Variables                | Simulation | OBS   | MOD    | R    | NMB   | MB     | MAE   | RMSE  |
|--------------------------|------------|-------|--------|------|-------|--------|-------|-------|
| Temperature<br>(°C)      | [Base]     | 26.18 | 25.82  | 0.88 | -0.01 | -0.36  | 1.69  | 2.15  |
|                          | [WSM6]     |       | 25.84  | 0.89 | -0.01 | -0.35  | 1.57  | 1.99  |
|                          | [YSU]      |       | 26.29  | 0.89 | 0.00  | 0.11   | 1.65  | 2.11  |
|                          | [ACM2]     |       | 25.95  | 0.86 | -0.01 | -0.23  | 1.76  | 2.23  |
|                          | [ERA5]     |       | 24.91  | 0.85 | -0.05 | -1.28  | 2.17  | 2.71  |
|                          | [HRRR]     |       | 26.12  | 0.89 | 0.00  | -0.06  | 1.59  | 2.05  |
|                          | [Nudged]   |       | 25.92  | 0.92 | -0.01 | -0.26  | 1.43  | 1.84  |
|                          | [Re-init]  |       | 25.69  | 0.92 | -0.02 | -0.49  | 1.41  | 1.77  |
| Relative humidity<br>(%) | [Base]     | 60.12 | 60.94  | 0.76 | 0.01  | 0.82   | 10.25 | 13.04 |
|                          | [WSM6]     |       | 62.21  | 0.78 | 0.03  | 2.09   | 9.85  | 12.28 |
|                          | [YSU]      |       | 58.45  | 0.80 | -0.03 | -1.68  | 9.54  | 12.31 |
|                          | [ACM2]     |       | 62.73  | 0.71 | 0.04  | 2.60   | 11.40 | 14.71 |
|                          | [ERA5]     |       | 64.21  | 0.77 | 0.07  | 4.08   | 10.55 | 12.76 |
|                          | [HRRR]     |       | 57.82  | 0.79 | -0.04 | -2.30  | 9.13  | 12.13 |
|                          | [Nudged]   |       | 64.63  | 0.82 | 0.08  | 4.51   | 9.54  | 12.05 |
|                          | [Re-init]  |       | 62.57  | 0.84 | 0.04  | 2.45   | 8.37  | 10.66 |
| Wind speed<br>(m/s)      | [Base]     | 0.67  | 1.29   | 0.35 | 0.59  | 1.01   | 1.40  | 1.70  |
|                          | [WSM6]     |       | 1.67   | 0.37 | 0.61  | 1.04   | 1.39  | 1.72  |
|                          | [YSU]      |       | 0.80   | 0.39 | 0.75  | 1.29   | 1.55  | 1.87  |
|                          | [ACM2]     |       | 1.16   | 0.38 | 0.66  | 1.12   | 1.44  | 1.77  |
|                          | [ERA5]     |       | 1.76   | 0.43 | 0.64  | 1.09   | 1.38  | 1.66  |
|                          | [HRRR]     |       | 1.00   | 0.54 | 0.49  | 0.83   | 1.12  | 1.36  |
|                          | [Nudged]   |       | 0.89   | 0.55 | 0.30  | 0.51   | 0.96  | 1.20  |
|                          | [Re-init]  |       | 1.14   | 0.61 | 0.48  | 0.82   | 1.07  | 1.31  |
| Wind direction<br>(deg)  | [Base]     | 87.76 | 72.32  | 0.43 | -0.05 | -7.67  | 56.5  | 73.36 |
|                          | [WSM6]     |       | 72.56  | 0.38 | -0.04 | -5.51  | 56.41 | 72.93 |
|                          | [YSU]      |       | 53.26  | 0.41 | -0.08 | -12.14 | 60.30 | 77.29 |
|                          | [ACM2]     |       | 54.87  | 0.37 | -0.07 | -10.64 | 64.15 | 81.29 |
|                          | [ERA5]     |       | 47.32  | 0.43 | -0.07 | -10.92 | 58.05 | 74.83 |
|                          | [HRRR]     |       | 92.51  | 0.61 | -0.02 | -3.43  | 40.16 | 57.55 |
|                          | [Nudged]   |       | 93.29  | 0.48 | 0.02  | 3.00   | 46.05 | 64.70 |
|                          | [Re-init]  |       | 109.03 | 0.47 | 0.00  | -0.32  | 39.99 | 57.67 |



1  
2

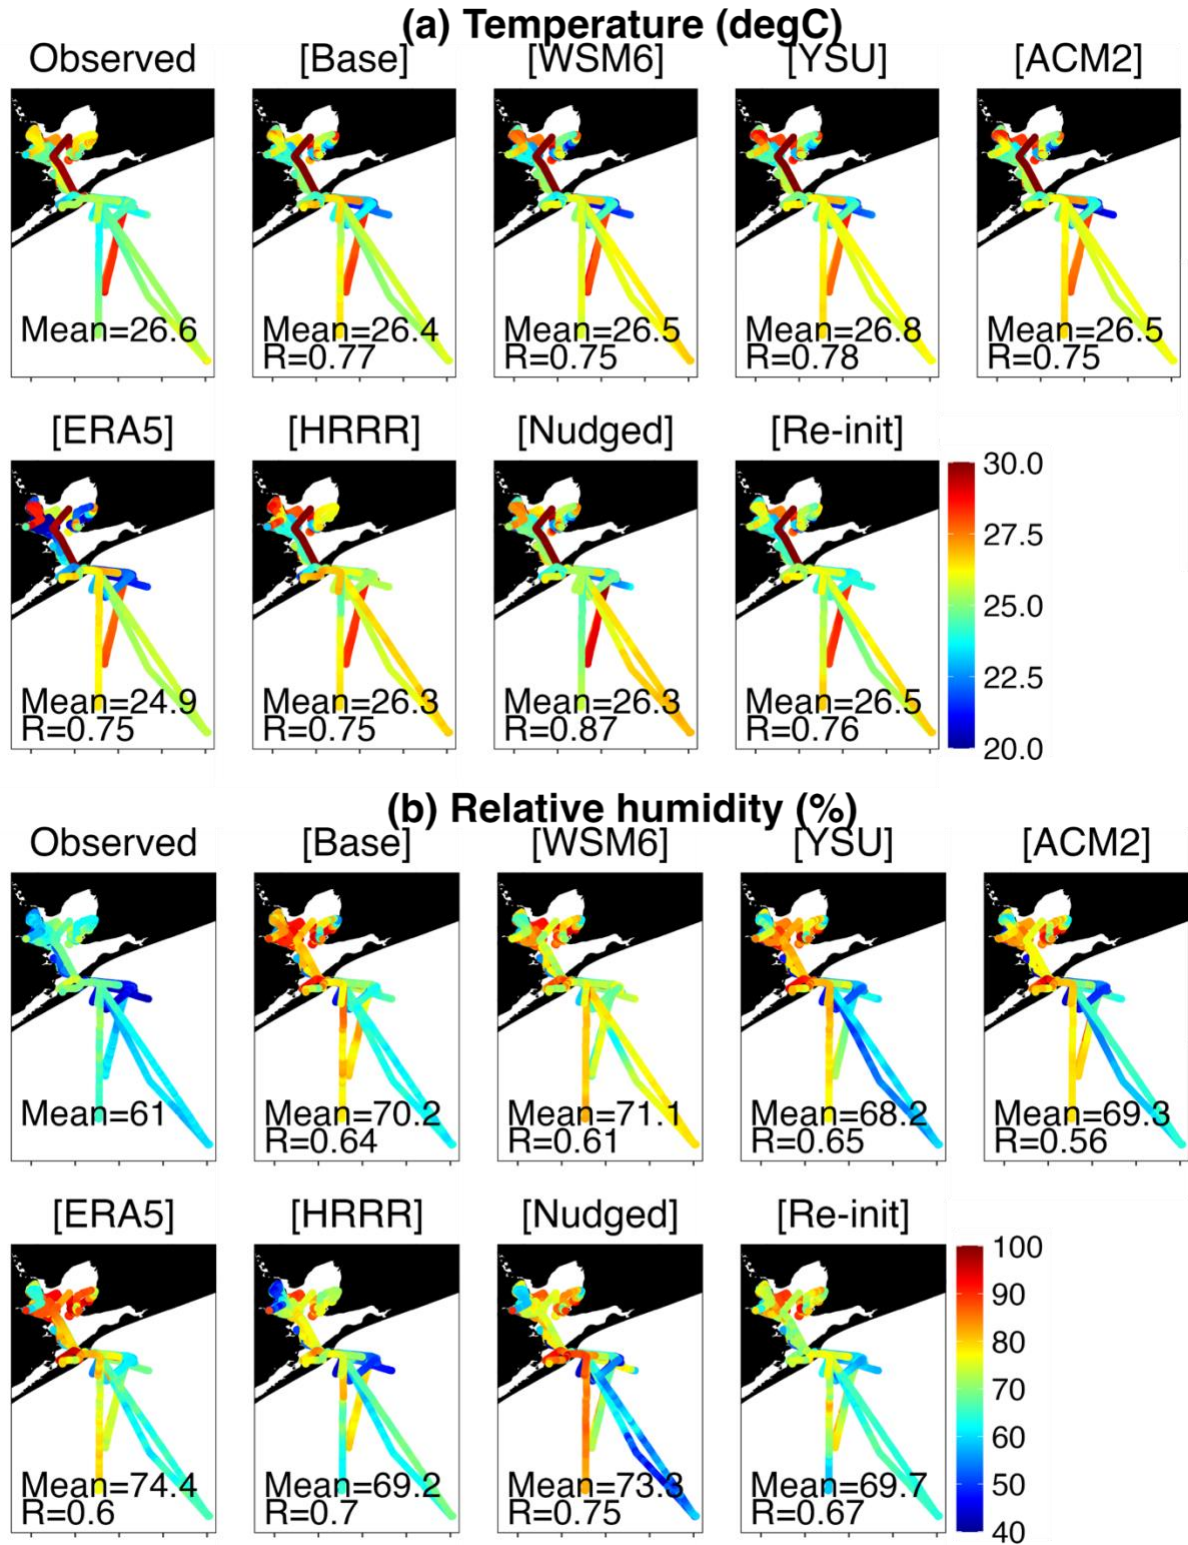

3  
4  
5

**Figure S4.** Spatial distribution of boat-observed and modeled meteorology during ozone episodes.

1

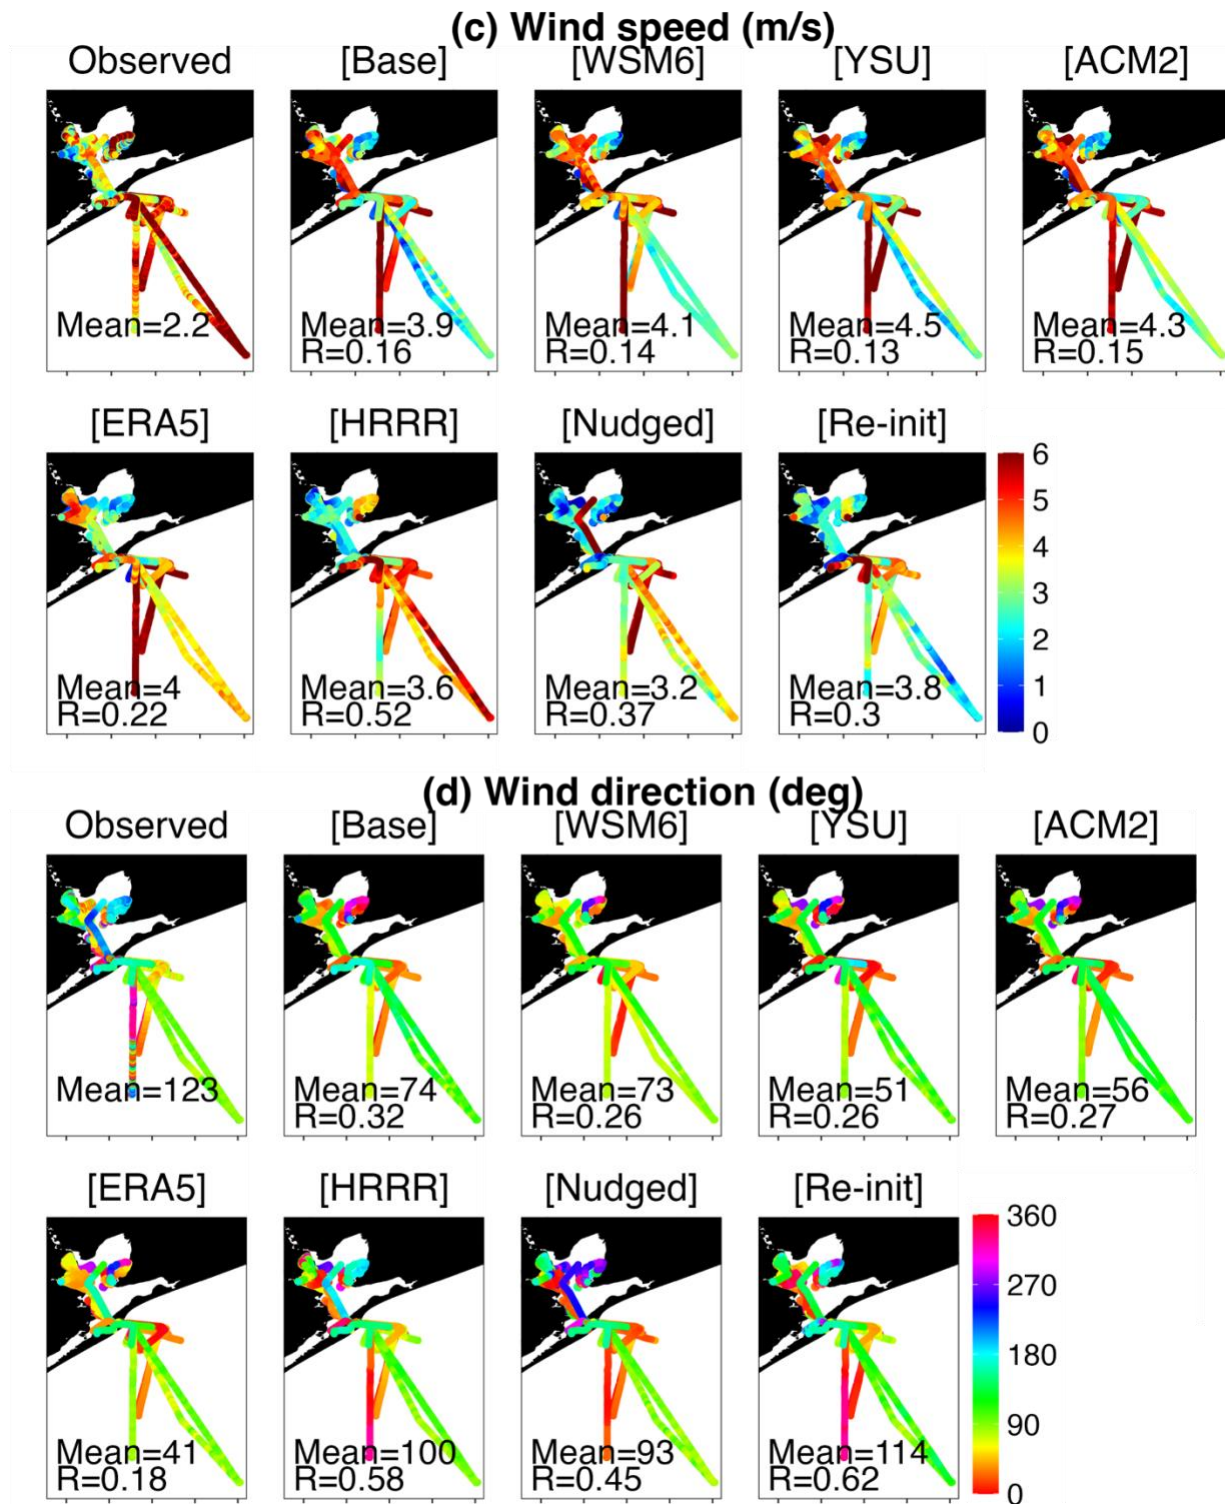

2  
3  
4

**Figure S4 (continued).** Spatial distribution of boat-observed and modeled meteorology during ozone episodes.

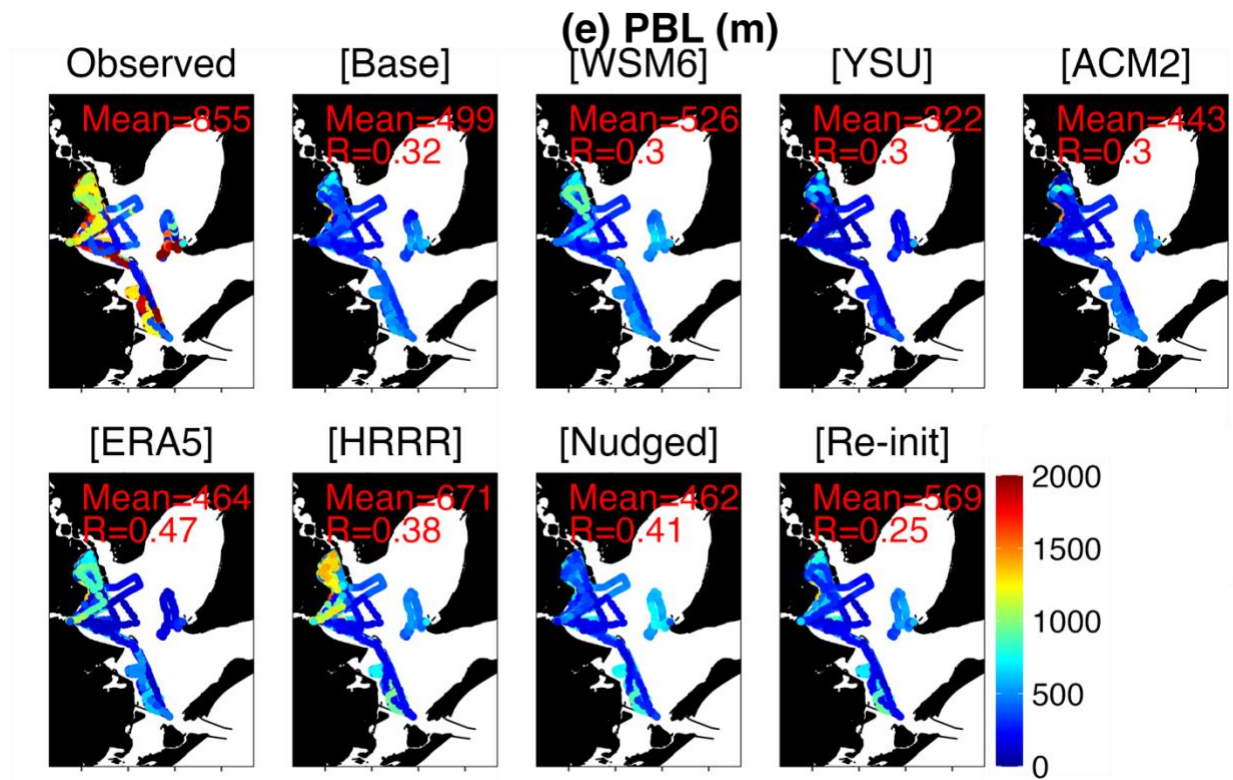

1  
 2 **Figure S4 (continued).** Spatial distribution of boat-observed and modeled meteorology during  
 3 ozone episodes.

4



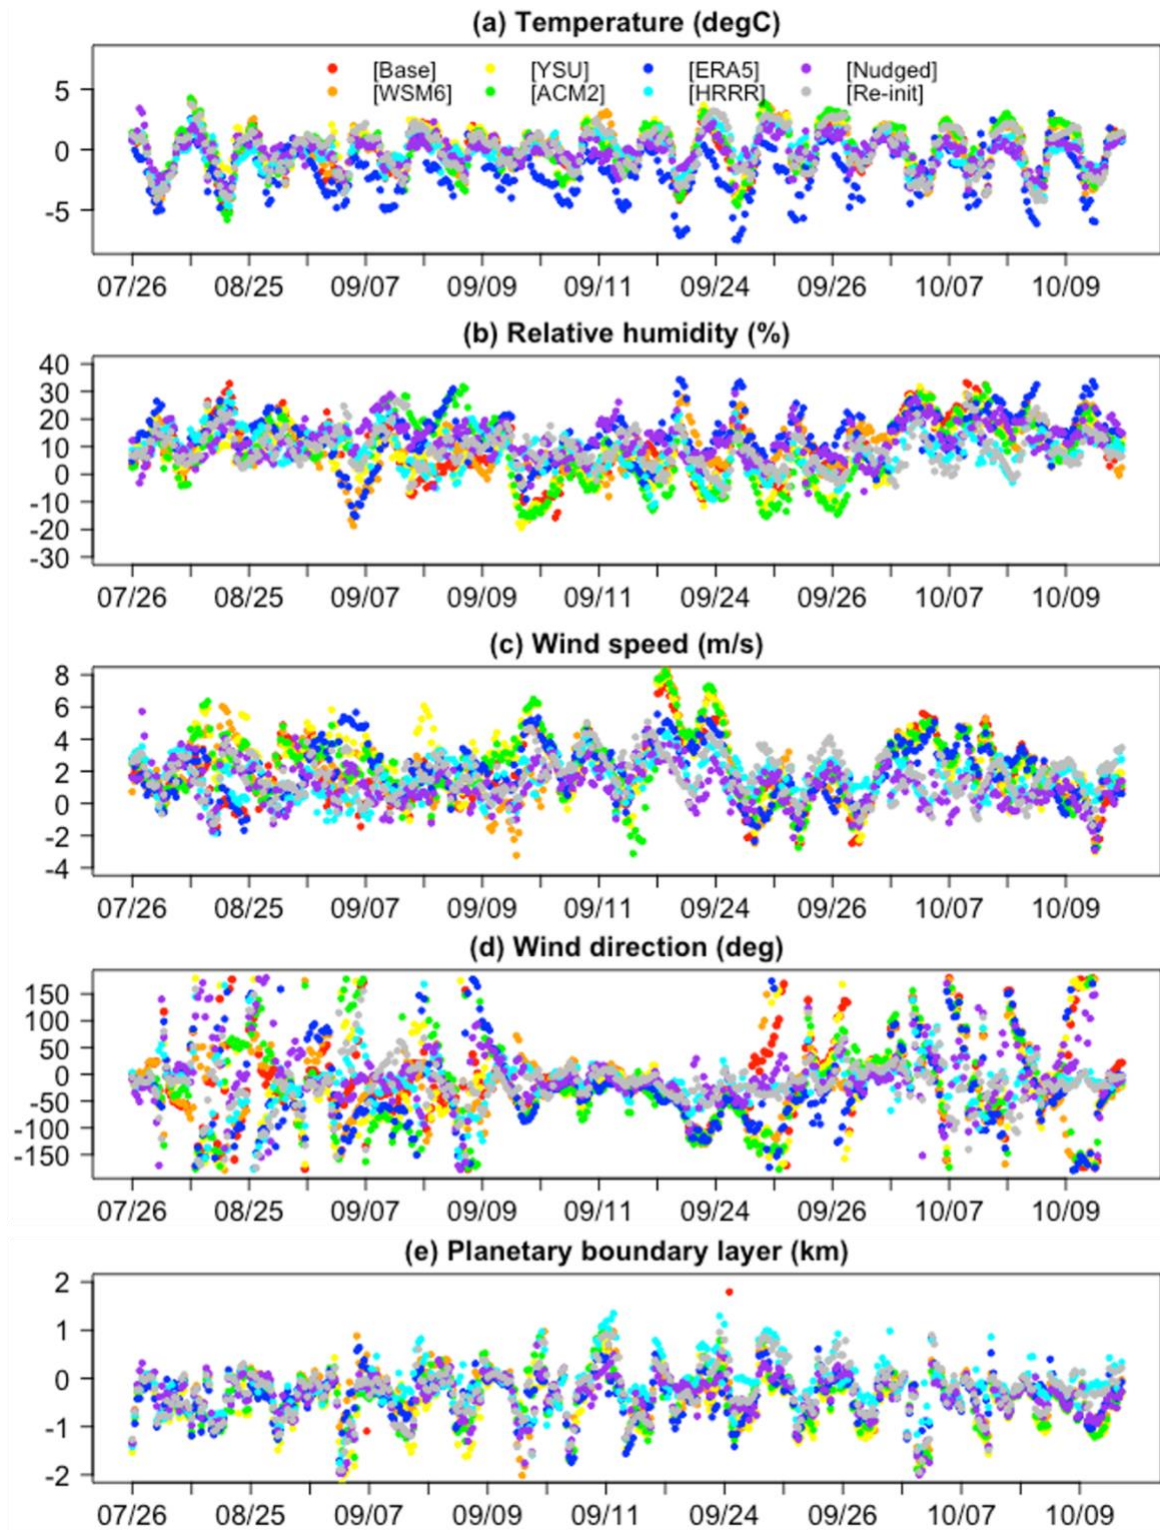

1  
2 **Figure S5.** Hourly time series of observation-model differences (i.e., model minus observation)  
3 are shown for (a) air temperature, (b) relative humidity, (c) wind speed, (d) wind direction and  
4 (e) boundary layer height during ozone episodes. Refer to Text S3 for the calculations of  
5 averages of wind speed and directions, as well as the differences between observed and modeled  
6 wind directions.

1 **Table S4.** Performance metrics of spatiotemporal variability between boat-observed and WRF-  
2 modeled meteorology during ozone episodes. 1-minute meteorology is used for the calculation of  
3 performance metrics below. All metrics have the same unit as meteorological variables, except  
4 that the correlation coefficient (R) and normal mean bias (NMB) are unitless. OBS and MOD  
5 represent the spatial and temporal averages of observations and model equivalents, respectively.

| Variables                | Simulation | OBS    | MOD    | R    | NMB   | MB      | MAE    | RMSE   |
|--------------------------|------------|--------|--------|------|-------|---------|--------|--------|
| Temperature<br>(°C)      | [Base]     | 26.55  | 26.45  | 0.77 | 0.00  | -0.11   | 1.71   | 2.14   |
|                          | [WSM6]     |        | 26.50  | 0.75 | 0.00  | -0.05   | 1.77   | 2.20   |
|                          | [YSU]      |        | 26.78  | 0.78 | 0.01  | 0.22    | 1.71   | 2.10   |
|                          | [ACM2]     |        | 26.51  | 0.75 | 0.00  | -0.04   | 1.78   | 2.21   |
|                          | [ERA5]     |        | 24.85  | 0.75 | -0.06 | -1.70   | 2.21   | 3.00   |
|                          | [HRRR]     |        | 26.30  | 0.75 | -0.01 | -0.25   | 1.89   | 2.29   |
|                          | [Nudged]   |        | 26.30  | 0.87 | -0.01 | -0.25   | 1.26   | 1.65   |
|                          | [Re-init]  |        | 26.53  | 0.76 | 0.00  | -0.02   | 1.71   | 2.15   |
| Relative humidity<br>(%) | [Base]     | 60.96  | 70.24  | 0.64 | 0.15  | 9.28    | 11.95  | 14.59  |
|                          | [WSM6]     |        | 71.09  | 0.61 | 0.17  | 10.14   | 11.76  | 14.38  |
|                          | [YSU]      |        | 68.20  | 0.65 | 0.12  | 7.24    | 10.96  | 13.29  |
|                          | [ACM2]     |        | 69.35  | 0.56 | 0.14  | 8.40    | 12.75  | 15.33  |
|                          | [ERA5]     |        | 74.38  | 0.60 | 0.22  | 13.42   | 14.66  | 17.23  |
|                          | [HRRR]     |        | 69.20  | 0.70 | 0.14  | 8.24    | 10.38  | 12.68  |
|                          | [Nudged]   |        | 73.35  | 0.75 | 0.20  | 12.39   | 12.87  | 14.92  |
|                          | [Re-init]  |        | 69.68  | 0.67 | 0.14  | 8.72    | 10.25  | 12.42  |
| Wind speed<br>(m/s)      | [Base]     | 0.73   | 2.47   | 0.16 | 0.74  | 1.67    | 2.20   | 2.78   |
|                          | [WSM6]     |        | 2.62   | 0.14 | 0.82  | 1.85    | 2.33   | 2.92   |
|                          | [YSU]      |        | 2.17   | 0.13 | 0.99  | 2.22    | 2.63   | 3.19   |
|                          | [ACM2]     |        | 1.99   | 0.15 | 0.92  | 2.07    | 2.49   | 3.09   |
|                          | [ERA5]     |        | 1.89   | 0.22 | 0.78  | 1.74    | 2.21   | 2.72   |
|                          | [HRRR]     |        | 1.68   | 0.52 | 0.59  | 1.32    | 1.69   | 2.05   |
|                          | [Nudged]   |        | 1.75   | 0.37 | 0.41  | 0.92    | 1.57   | 1.96   |
|                          | [Re-init]  |        | 2.02   | 0.30 | 0.69  | 1.55    | 2.00   | 2.41   |
| Wind direction<br>(deg)  | [Base]     | 144.15 | 118.78 | 0.32 | -0.08 | -11.45  | 57.74  | 75.38  |
|                          | [WSM6]     |        | 113.5  | 0.26 | -0.13 | -19.10  | 60.40  | 77.29  |
|                          | [YSU]      |        | 135.77 | 0.26 | -0.11 | -16.44  | 63.52  | 81.13  |
|                          | [ACM2]     |        | 125.25 | 0.27 | -0.11 | -17.20  | 68.93  | 85.92  |
|                          | [ERA5]     |        | 96.69  | 0.18 | -0.17 | -25.20  | 69.00  | 85.30  |
|                          | [HRRR]     |        | 137.93 | 0.58 | -0.08 | -12.53  | 41.54  | 58.16  |
|                          | [Nudged]   |        | 146.95 | 0.45 | -0.05 | -7.68   | 47.87  | 65.51  |
|                          | [Re-init]  |        | 146.96 | 0.62 | -0.10 | -14.98  | 42.98  | 59.66  |
|                          | [Base]     | 855.58 | 499.27 | 0.32 | -0.42 | -356.30 | 529.63 | 699.67 |

|                           |           |        |      |       |         |        |        |
|---------------------------|-----------|--------|------|-------|---------|--------|--------|
| Boundary layer height (m) | [WSM6]    | 526.69 | 0.30 | -0.38 | -328.88 | 526.38 | 691.82 |
|                           | [YSU]     | 322.22 | 0.30 | -0.62 | -533.36 | 612.29 | 817.16 |
|                           | [ACM2]    | 443.60 | 0.30 | -0.48 | -411.97 | 562.12 | 747.06 |
|                           | [ERA5]    | 464.75 | 0.47 | -0.46 | -390.83 | 507.51 | 680.30 |
|                           | [HRRR]    | 671.27 | 0.38 | -0.22 | -184.31 | 461.30 | 637.68 |
|                           | [Nudged]  | 462.09 | 0.41 | -0.46 | -393.48 | 516.18 | 696.37 |
|                           | [Re-init] | 569.57 | 0.25 | -0.33 | -286.00 | 518.21 | 689.22 |

1  
2  
3  
4  
5  
6  
7  
8  
9  
10  
11  
12  
13

References:

Li, W., Wang, Y., Liu, X., Soleimanian, E., Griggs, T., Flynn, J., and Walter, P.: Understanding offshore high-ozone events during TRACER-AQ 2021 in Houston: Insights from WRF-CAMx photochemical modeling, EGUsphere [preprint], <https://doi.org/10.5194/egusphere-2023-1117>, 2023.

Yu, E., Bai, R., Chen, X., and Shao, L.: Impact of physical parameterizations on wind simulation with WRF V3.9.1.1 under stable conditions at planetary boundary layer gray-zone resolution: a case study over the coastal regions of North China, *Geosci. Model Dev.*, 15, 8111–8134, <https://doi.org/10.5194/gmd-15-8111-2022>, 2022.
